# Supplementary material for: Enabling Health Outcomes of Nature-based Interventions: A Systematic Scoping Review
Source: bioRxiv or medRxiv preprint supplement (doi:10.1101/2022.03.16.22272412), 2022-03-18
Supplement: Supplementary file [file media-5.pdf]

| # | Authors and Date                                                                                                       | Country               | Study Design                                                          | Population                                                             | Natural environment(s)                                                               | Intervention or exposure                                              | Key findings                                                                                                                                                                                                                                                                                | Barriers (B) or Facilitators (F)                                                                                                                                                                                                                                                                                                                                                                                                        |
|---|------------------------------------------------------------------------------------------------------------------------|-----------------------|-----------------------------------------------------------------------|------------------------------------------------------------------------|--------------------------------------------------------------------------------------|-----------------------------------------------------------------------|---------------------------------------------------------------------------------------------------------------------------------------------------------------------------------------------------------------------------------------------------------------------------------------------|-----------------------------------------------------------------------------------------------------------------------------------------------------------------------------------------------------------------------------------------------------------------------------------------------------------------------------------------------------------------------------------------------------------------------------------------|
| 1 | <i>Sprague N., Berrigan D., and Ekenga C. (2020)</i>                                                                   | USA                   | Interventional study (non-randomized experiment) – with mixed-methods | <b>Children</b> (n=122; age range: 10-15-year-old)                     | Green spaces – urban forest parks, camping trips, urban farms, cave trips            | NBE - Nature-Based Education                                          | <ul style="list-style-type: none"> <li>- Statistically significant positive changes in <b>STEM</b> capacity (+44%) and <b>HRQoL</b> (+46%) for participating students.</li> <li>- Qualitative data highlighted the intervention's <b>educational</b> and <b>health</b> benefits.</li> </ul> | <ul style="list-style-type: none"> <li>- <b>Age</b> (F) - the older the child, the more active they will be, and the more benefits they will have on <b>HRQoL</b>. No effect for <b>STEM</b>.</li> <li>- <b>Duration</b> - the longer tended to have more beneficial effects on <b>STEM capacity</b>.</li> <li>- <b>Stressful life events</b> - the more one experiences, the less likely they will have benefits from NOEs.</li> </ul> |
| 2 | <i>Arnberger A., Eder R., Allex B., Ebenberger M., Hutter H.P., Wallner P., Bauer N., Zaller J. and Frank T.(2018)</i> | Austria & Switzerland | Interventional study (field experiment) – using mixed-methods         | Adults (workers and university students) (n=22, age mean=26.7; SD=4.1) | Both - one urban city, two meadows (managed vs unmanaged) and river in mountain area | Wilderness expedition – walking and interacting (i.e. viewing) nature | <ul style="list-style-type: none"> <li>- While differences measured on the physiological level between urban built and natural sites were <b>marginal</b> (on DBP not SBP), psychological measures showed <b>higher health benefits</b> of the <b>natural environments</b></li> </ul>       | <ul style="list-style-type: none"> <li>- <b>Environment type</b> (B/F) - river and alpine mountain meadow had the highest health benefits in terms of restoration, BP, and perception of beauty; but all sites recorded an improvement on calming and positive effect post-intervention.</li> </ul>                                                                                                                                     |

|   |                                                                  |       |                                                                         |                                                                        |                               |                                       |                                                                                                                                                                                                                                                                                                                                                                             |                                                                                                                                                                                                                                                                                                                                                                                                                                                                                                                                                                                                                               |
|---|------------------------------------------------------------------|-------|-------------------------------------------------------------------------|------------------------------------------------------------------------|-------------------------------|---------------------------------------|-----------------------------------------------------------------------------------------------------------------------------------------------------------------------------------------------------------------------------------------------------------------------------------------------------------------------------------------------------------------------------|-------------------------------------------------------------------------------------------------------------------------------------------------------------------------------------------------------------------------------------------------------------------------------------------------------------------------------------------------------------------------------------------------------------------------------------------------------------------------------------------------------------------------------------------------------------------------------------------------------------------------------|
|   |                                                                  |       |                                                                         |                                                                        |                               |                                       | compared to the built one.                                                                                                                                                                                                                                                                                                                                                  |                                                                                                                                                                                                                                                                                                                                                                                                                                                                                                                                                                                                                               |
| 3 | Gargiulo I., Benages-Albert M., Garcia X. & Vall-Casas P. (2020) | Spain | Observational study (exploratory fieldwork) – using qualitative methods | Adults stream users (N=30; F=14 and M=16, age range: 27-65+ years old) | Green – urban stream corridor | Leisure-Time Physical Activity (LTPA) | <ul style="list-style-type: none"> <li>- Social and physical factors of the environment are perceived as either barriers or facilitators, with different nuances and importance, depending on each type of user.</li> <li>- Also, for the same type of user, factors perception also depends on gender; whereby safety was important for women engaging in LTPA.</li> </ul> | <ul style="list-style-type: none"> <li>- <b>Safety (B)</b> – women reported lower level of use of blue/green spaces during LTPA if safety was a concern.</li> <li>- <b>Environmental design (B/F)</b> - itineraries with enhanced visibility, higher attendance, pruning of dense vegetation and provisioning of assistance in case of need, all promoted engagement in LTPA.</li> <li>- <b>Accessibility (F)</b> - stream accessibility and proximity to environments is conducive for LTPA.</li> <li>- <b>Presence of others (B/F)</b> - having someone to share the experience with facilitated engagement. But</li> </ul> |

|   |                                |    |                                                               |                                                                                                    |                                               |              |                                                                                                                                                                                                                                                                                                                                                                                                                                                                                           |                                                                                                                                                                                                                                                                                                                                                         |
|---|--------------------------------|----|---------------------------------------------------------------|----------------------------------------------------------------------------------------------------|-----------------------------------------------|--------------|-------------------------------------------------------------------------------------------------------------------------------------------------------------------------------------------------------------------------------------------------------------------------------------------------------------------------------------------------------------------------------------------------------------------------------------------------------------------------------------------|---------------------------------------------------------------------------------------------------------------------------------------------------------------------------------------------------------------------------------------------------------------------------------------------------------------------------------------------------------|
|   |                                |    |                                                               |                                                                                                    |                                               |              |                                                                                                                                                                                                                                                                                                                                                                                                                                                                                           | <p>can be a barrier when perceived as <b>safety risk</b> (i.e. walkers vs runners/cyclists and vice-versa).</p> <ul style="list-style-type: none"> <li>- <b>Environment type</b> (F)</li> </ul>                                                                                                                                                         |
| 4 | Denton H. and Aranda K. (2019) | UK | Observational study (ethnography) – using qualitative methods | Adults (regular swimmers and existing club members) (n=6; F=3 and M=6, age range: 38-73 years old) | Blue space - sea swimming club (Brighton, UK) | Sea swimming | <ul style="list-style-type: none"> <li>- The swimmers found sea swimming <b>transformative</b>, (resulting in changes in the swimmer's experience of themselves); <b>connecting</b> (experiencing a sense of connection to nature, place and others); and <b>re-orientating</b> (as swimmers seemed to use this disruption to reconnect to what they consider is important), through <b>the disruption to the sense of time, space and body</b>, swimmers find alternative and</li> </ul> | <ul style="list-style-type: none"> <li>- <b>Physical activity</b> - engaging actively in the sea by swimming was critical to gaining health benefits (i.e. emotional and physical health)</li> <li>- <b>Fear and stigma</b> - negative body image can impact one's engagement in sea swimming; but also fear of the challenges from the sea.</li> </ul> |

|   |                                                                     |        |                                                                           |                                                                                   |                                                                   |         |                                                                                                                                                                                                                                                                                                                               |                                                                                                                                                                                                                                                                                                                                                                                           |
|---|---------------------------------------------------------------------|--------|---------------------------------------------------------------------------|-----------------------------------------------------------------------------------|-------------------------------------------------------------------|---------|-------------------------------------------------------------------------------------------------------------------------------------------------------------------------------------------------------------------------------------------------------------------------------------------------------------------------------|-------------------------------------------------------------------------------------------------------------------------------------------------------------------------------------------------------------------------------------------------------------------------------------------------------------------------------------------------------------------------------------------|
|   |                                                                     |        |                                                                           |                                                                                   |                                                                   |         | expanded perspectives about themselves and their world.                                                                                                                                                                                                                                                                       |                                                                                                                                                                                                                                                                                                                                                                                           |
| 5 | Finlay J.,<br>Franke T.,<br>McKay H. and<br>Sims-Gould J.<br>(2015) | Canada | Observational study (participant observation) – using qualitative methods | Older adults (community dwellers; T1: N=27; T2: N=19, age range: 65-86 years old) | Both - urban parks in neighbourhood, with green and blue features | Walking | <ul style="list-style-type: none"> <li>- Older adults have distinct <b>therapeutic relationships</b> with landscapes.</li> <li>- Nature <b>can promote the physical, mental, and social health</b> of older adults.</li> <li>- Blue space in particular embodies important therapeutic qualities for older adults.</li> </ul> | <ul style="list-style-type: none"> <li>- <b>Safety</b> (B/F)- can be experienced differently by people.</li> <li>- <b>Accessibility</b> (B/F) - the least accessible, the worst the experience</li> <li>- <b>Personal perception</b> (B/F) - the same place could evoke feelings from enjoyment to indifference to concern due to traffic, park maintenance, walkability, etc.</li> </ul> |

|   |                                                                                                         |     |                                                                      |                                                                           |                                                      |                                                                                                   |                                                                                                                                                                                                                                                                                                                                                                                                                                                                           |                                                                                                                                                                                                                                                                                                                                                                                                                                                                                                          |
|---|---------------------------------------------------------------------------------------------------------|-----|----------------------------------------------------------------------|---------------------------------------------------------------------------|------------------------------------------------------|---------------------------------------------------------------------------------------------------|---------------------------------------------------------------------------------------------------------------------------------------------------------------------------------------------------------------------------------------------------------------------------------------------------------------------------------------------------------------------------------------------------------------------------------------------------------------------------|----------------------------------------------------------------------------------------------------------------------------------------------------------------------------------------------------------------------------------------------------------------------------------------------------------------------------------------------------------------------------------------------------------------------------------------------------------------------------------------------------------|
| 6 | <p>McEwan K.,<br/>Richardson M.,<br/>Sheffield D.,<br/>Ferguson F.J.<br/>and Brindley P.<br/>(2019)</p> | UK  | Interventional study (RCT) – quantitative methods                    | <p>Adults (18+) residing in Sheffield and owning a smartphone (N=148)</p> | Greenspace – urban park vs control (urban built)     | Social prescription app on smartphone design to make people notice nature (while being in nature) | <ul style="list-style-type: none"> <li>- Using a social prescription using a Smartphone app (noticing nature) resulted in statistically significant <b>improvements in wellbeing</b> for adults in general, and <b>clinically significant</b> improvements in wellbeing for those classed as having a mental health difficulty.</li> <li>- These improvements were more pronounced in the <b>green space</b> condition, despite improvements still in control.</li> </ul> | <ul style="list-style-type: none"> <li>- <b>Environment type (F)</b> – both built and green environment yielded short-term benefits on wellbeing through <b>nature connectedness</b>; but only green space condition had sustained effects after one-month follow-up.</li> <li>- <b>Previous experience with nature (F)</b> – from childhood or in the last year, both have positive effects on wellbeing.</li> <li>- <b>Positive affect (F)</b> – predictor of wellbeing in green condition.</li> </ul> |
| 7 | <p>Nicolosi V.,<br/>Wilson J.,<br/>Yoshino A. &amp;<br/>Viren P. (2020)</p>                             | USA | Interventional study (field experiment) – using quantitative methods | <p>Adults (undergraduates ) (n=63; F=31 and M=32;</p>                     | Blue spaces – the coast vs control (urban side-road) | Coastal and urban walk                                                                            | <ul style="list-style-type: none"> <li>- Significantly higher average <b>perceived restoration</b> scores were associated with the natural (coastal) walk.</li> <li>- <b>Coastal exposure, sound quality</b></li> </ul>                                                                                                                                                                                                                                                   | <ul style="list-style-type: none"> <li>- <b>Perceived sound level (F)</b> - higher perceived sound level was a significant predictor of a restorative experience.</li> <li>- <b>Environment type (F)</b> – if in natural environment, then increased</li> </ul>                                                                                                                                                                                                                                          |

|   |                                                             |        |                                                             |                                                                                                                       |                                                                         |                                             |                                                                                                                                                                                                                                                                                                                                                                                                                                                                                                       |                                                                                                                                                                                                                                                                                                                                                                                                                                                                                                                                                                             |
|---|-------------------------------------------------------------|--------|-------------------------------------------------------------|-----------------------------------------------------------------------------------------------------------------------|-------------------------------------------------------------------------|---------------------------------------------|-------------------------------------------------------------------------------------------------------------------------------------------------------------------------------------------------------------------------------------------------------------------------------------------------------------------------------------------------------------------------------------------------------------------------------------------------------------------------------------------------------|-----------------------------------------------------------------------------------------------------------------------------------------------------------------------------------------------------------------------------------------------------------------------------------------------------------------------------------------------------------------------------------------------------------------------------------------------------------------------------------------------------------------------------------------------------------------------------|
|   |                                                             |        |                                                             | age mean=20.4)                                                                                                        |                                                                         |                                             | and type were rated as very good and more natural than the sidewalk respectively and were significant predictors of a <b>restorative experience.</b>                                                                                                                                                                                                                                                                                                                                                  | perceived restoration.                                                                                                                                                                                                                                                                                                                                                                                                                                                                                                                                                      |
| 8 | <i>Cheesbrough A.E., Garvin T., Nykiforuk C.I.J. (2019)</i> | Canada | Observational study (case study)– using qualitative methods | Adults and older adults (residents around one of the five selected NAP); (n=33; F=18 and M=15; age range=29-87 years) | Both – within five Natural Area Parks (blue and green features present) | Nature photography and reflection in nature | <ul style="list-style-type: none"> <li>- <b>Proximity</b> to natural areas facilitated frequent and spontaneous visits.</li> <li>- <b>Repeat visits</b> fostered intimacy with the space over time.</li> <li>- Participants felt 'away from the city' while in the middle of the city.</li> <li>- Participants reported <b>physical, spiritual and psychological therapeutic impacts.</b></li> <li>- Natural areas facilitated <b>connections to nature, self, companions, and others.</b></li> </ul> | <ul style="list-style-type: none"> <li>- <b>Proximity</b> (F) - increase engagement <b>in physical activity</b> and therefore promotes improved health benefits.</li> <li>- <b>Topography</b> - more difficult terrain were <b>motivational</b> for users of NAPs.</li> <li>- <b>Sensory qualities</b> (F) - facilitated a <b>positive experience</b> of being in nature, and therefore allowed for this visit to be a <b>restorative experience.</b></li> <li>- <b>Safety</b> (B) - main barrier to using these areas (whether for fear of humans or wildlife).</li> </ul> |

|   |                                                                              |                                    |                                                                             |                                                                       |                                            |                                                      |                                                                                                                                                                                                                                                                                                                                                                                                                                                                      |                                                                                                                                                                                                                                                                                                      |
|---|------------------------------------------------------------------------------|------------------------------------|-----------------------------------------------------------------------------|-----------------------------------------------------------------------|--------------------------------------------|------------------------------------------------------|----------------------------------------------------------------------------------------------------------------------------------------------------------------------------------------------------------------------------------------------------------------------------------------------------------------------------------------------------------------------------------------------------------------------------------------------------------------------|------------------------------------------------------------------------------------------------------------------------------------------------------------------------------------------------------------------------------------------------------------------------------------------------------|
| 9 | <p><i>Barton J., Bragg R., Pretty J., Roberts J., and Wood C. (2016)</i></p> | <p>South Africa &amp; Scotland</p> | <p>Interventional study (field experiment) – using quantitative methods</p> | <p>Adolescents (n=130; F=74 and M=57; age range: 11-18 years old)</p> | <p>Both – in a game reserve and a loch</p> | <p>Wilderness expedition in natural environments</p> | <ul style="list-style-type: none"> <li>- Environment, gender, and the length and location of expeditions significantly contributed to PPTs' changes in self-esteem (SE) and nature connectedness (NC).</li> <li>- PPTs living in urban environments and going to local wilderness for a short duration will receive the same amount of benefits SE and NC as PPTs who live in a <b>rural location</b> and are immersed in a remote wilderness for longer.</li> </ul> | <ul style="list-style-type: none"> <li>- <b>Gender (F)</b> - males had higher self-esteem at start, but significant increase in SE for females at the end.</li> <li>- <b>Duration (F)</b>- even short durations of expeditions can have benefits on nature connectedness and self-esteem.</li> </ul> |
|---|------------------------------------------------------------------------------|------------------------------------|-----------------------------------------------------------------------------|-----------------------------------------------------------------------|--------------------------------------------|------------------------------------------------------|----------------------------------------------------------------------------------------------------------------------------------------------------------------------------------------------------------------------------------------------------------------------------------------------------------------------------------------------------------------------------------------------------------------------------------------------------------------------|------------------------------------------------------------------------------------------------------------------------------------------------------------------------------------------------------------------------------------------------------------------------------------------------------|

|        |                                                                                                                                                                    |         |                                                                      |                                                                           |                                                                                       |                                                               |                                                                                                                                                                                                                                                                                                                                                                                                                                                                                                                                                                                                                    |                                                                                                                                                                                                                                                                                                                                                                       |
|--------|--------------------------------------------------------------------------------------------------------------------------------------------------------------------|---------|----------------------------------------------------------------------|---------------------------------------------------------------------------|---------------------------------------------------------------------------------------|---------------------------------------------------------------|--------------------------------------------------------------------------------------------------------------------------------------------------------------------------------------------------------------------------------------------------------------------------------------------------------------------------------------------------------------------------------------------------------------------------------------------------------------------------------------------------------------------------------------------------------------------------------------------------------------------|-----------------------------------------------------------------------------------------------------------------------------------------------------------------------------------------------------------------------------------------------------------------------------------------------------------------------------------------------------------------------|
| 1<br>0 | <p>Lanki T.,<br/>Siponen T.,<br/>Ojala A.,<br/>Korpela K.,<br/>Pennanen A.,<br/>Tiittanen P.,<br/>Tsunetsugu Y.,<br/>Kagawa T. and<br/>Tyrväinen L.<br/>(2017)</p> | Finland | Interventional study (field experiment) – using quantitative methods | Adults (female volunteers in Helsinki) (n=36; age range: 30-60 years old) | Green space (vs control) - an urban forest, an urban park, and a built-up city centre | Each visit: 15 min of sedentary viewing; and 30min of walking | <ul style="list-style-type: none"> <li>- Beneficial changes in <b>cardiovascular physiology</b> were observed in green environments.</li> <li>- Specifically, <b>lower blood pressure</b> (viewing period only), <b>lower heart rate</b>, and <b>higher indices of heart rate variability</b>.</li> <li>- <b>Large</b> urban park and <b>extensively managed</b> urban woodland had positive influence, but the overall perceived restorativeness was higher in the <b>woodland</b>.</li> <li>- This may be explained by <b>stress relief</b> and <b>lower air pollution</b> and <b>noise exposure</b>.</li> </ul> | <ul style="list-style-type: none"> <li>- <b>Stress relief</b> (F) – the more relaxed one is in NOE, the better their health outcomes.</li> <li>- <b>Air pollution</b> (B) – the higher the air pollution, the worst the health outcomes.</li> <li>- <b>Noise exposure</b> (B) – higher noise engenders higher stress, and therefore lower health benefits.</li> </ul> |
|--------|--------------------------------------------------------------------------------------------------------------------------------------------------------------------|---------|----------------------------------------------------------------------|---------------------------------------------------------------------------|---------------------------------------------------------------------------------------|---------------------------------------------------------------|--------------------------------------------------------------------------------------------------------------------------------------------------------------------------------------------------------------------------------------------------------------------------------------------------------------------------------------------------------------------------------------------------------------------------------------------------------------------------------------------------------------------------------------------------------------------------------------------------------------------|-----------------------------------------------------------------------------------------------------------------------------------------------------------------------------------------------------------------------------------------------------------------------------------------------------------------------------------------------------------------------|



|        |                                                                                                                |        |                                                         |                                                             |                                                                                                                                                            |                                                               |                                                                                                                                                                                                                                                                                                                                                                                                                                                     |                                                                                                                                                                                                                                                                                                                                                                                                                                        |
|--------|----------------------------------------------------------------------------------------------------------------|--------|---------------------------------------------------------|-------------------------------------------------------------|------------------------------------------------------------------------------------------------------------------------------------------------------------|---------------------------------------------------------------|-----------------------------------------------------------------------------------------------------------------------------------------------------------------------------------------------------------------------------------------------------------------------------------------------------------------------------------------------------------------------------------------------------------------------------------------------------|----------------------------------------------------------------------------------------------------------------------------------------------------------------------------------------------------------------------------------------------------------------------------------------------------------------------------------------------------------------------------------------------------------------------------------------|
| 1<br>1 | Marselle M.R.,<br>Warber S.L.<br>and Irvine K.N.<br>(2019)                                                     | UK     | Observational study – using quantitative methods        | Adults (volunteers) (N=1,516; age range: 55 years or older) | Both - natural environment (i.e., natural and semi-natural places, farmland, green corridor, coastal area, urban green space, or any mixture of the above) | Nature group walks                                            | <ul style="list-style-type: none"> <li>- Neither nature group walking, nor doing this frequently, moderated the effects of stressful life events on mental health.</li> <li>- The positive associations of group walks in nature were at a greater magnitude than the negative associations of stressful life events on depression, positive affect, and mental well-being, suggesting an <b>'undoing' effect of nature group walks.</b></li> </ul> | <ul style="list-style-type: none"> <li>- <b>Stressful life events (B)</b> – walking can help un-do stress associated with stressful life events by reducing depression and increasing positive affect and wellbeing.</li> <li>- <b>Presence of others (B)</b> - can dampen buffering effect of nature on mental health.</li> <li>- <b>Physical activity (F)</b> – mechanism by which individuals gain benefits from nature.</li> </ul> |
| 1<br>2 | PÁLSDÓTTIR A.M.,<br>STIGMAR K.,<br>NORRVING B.,<br>PETERSSON I.F., ÅSTRÖM M. and<br>PESSAH-RASMUSSEN H. (2020) | Sweden | Interventional study (RCT) – using quantitative methods | Adults and older adults (stroke survivors) (n=101; F=       | Green space - Alnarp Rehabilitation Garden (Nature Area (informal and non-cultivated) and the Cultivation and Gardening                                    | Nature-based rehabilitation (NBR) using horticultural therapy | <ul style="list-style-type: none"> <li>- The patients with sub-acute stroke were highly <b>compliant</b> with the intervention. The participants in both the intervention and control groups <b>improved.</b></li> </ul>                                                                                                                                                                                                                            | <ul style="list-style-type: none"> <li>- <b>Weather (B)</b> - not suitable NBR in bad weather.</li> <li>- <b>Access (B)</b> - acted as barrier to participation in NBR for some PPTs due to longer travel time to the garden.</li> </ul>                                                                                                                                                                                               |

|        |                                                    |       |                                                                      |                                                                                                                  |                                                                                        |                                                                                                   |                                                                                                                                                                                                                                                                                                                                                                                        |                                                                                                                                                                                                                                                                                                                |
|--------|----------------------------------------------------|-------|----------------------------------------------------------------------|------------------------------------------------------------------------------------------------------------------|----------------------------------------------------------------------------------------|---------------------------------------------------------------------------------------------------|----------------------------------------------------------------------------------------------------------------------------------------------------------------------------------------------------------------------------------------------------------------------------------------------------------------------------------------------------------------------------------------|----------------------------------------------------------------------------------------------------------------------------------------------------------------------------------------------------------------------------------------------------------------------------------------------------------------|
|        |                                                    |       |                                                                      | 61 and M=40; age range: 50–80 years old).                                                                        | Area (formal land cultivated))                                                         |                                                                                                   | <ul style="list-style-type: none"> <li>- However, <b>no statistically significant differences</b> in improvement were found between the intervention and control groups for any of the outcome measures.</li> <li>- <b>Fatigue decreased</b> to a value below the suggested cut-off for mental fatigue (&lt; 10.5) in the intervention group, but not in the control group.</li> </ul> |                                                                                                                                                                                                                                                                                                                |
| 1<br>3 | <i>Pratiwi P.I., Xiang Q. and Furuya K. (2019)</i> | Japan | Interventional study (field experiment) – using quantitative methods | Adults and older adults (local residents) (n=12 in spring; F=6 and M=6; mean age: 66.4) and (n=12 in summer; F=7 | Green spaces – across three sites: urban city site and two viewing spots in urban park | Viewing cherry blossom trees and fresh greenery in urban parks VS urban city in Spring and August | <ul style="list-style-type: none"> <li>- <b>Viewing cherry blossoms and fresh greenery</b> in urban parks led to <b>lower blood pressure</b> in spring and early summer than viewing city areas in spring and early summer.</li> <li>- The results of this study</li> </ul>                                                                                                            | <ul style="list-style-type: none"> <li>- <b>Seasons (F)</b> - positive mood states were higher in spring as well as lowered mood disturbances; whereas state-anxiety levels were lower in early summer.</li> <li>- <b>Environment type (F)</b> - green spaces &gt; urban city for physiological and</li> </ul> |

|  |  |  |  |                           |  |  |                                                                                                |                                                                                                                                                                                                                                                                                                                                                                                                                                                                                                                                                                            |
|--|--|--|--|---------------------------|--|--|------------------------------------------------------------------------------------------------|----------------------------------------------------------------------------------------------------------------------------------------------------------------------------------------------------------------------------------------------------------------------------------------------------------------------------------------------------------------------------------------------------------------------------------------------------------------------------------------------------------------------------------------------------------------------------|
|  |  |  |  | and M=5; mean age: 65.75) |  |  | <p>suggest that viewing urban parks results in physiological and psychological relaxation.</p> | <p>psychological effects of NBI.</p> <ul style="list-style-type: none"> <li>- <b>Biodiversity and surrounding features</b> (B/F) (i.e. mosquitoes, sun, temperature, etc.) - thought to have increased heart rate and modified BP measurements, when viewing urban parks in both seasons.</li> <li>- <b>Presence of water</b> (F) - associated with a significant <b>positive effect</b> and high perceived restorativeness.</li> <li>- <b>Traffic</b> (B) (i.e. people or noises from vehicles) - could be responsible for altering BP measures in urban city.</li> </ul> |
|--|--|--|--|---------------------------|--|--|------------------------------------------------------------------------------------------------|----------------------------------------------------------------------------------------------------------------------------------------------------------------------------------------------------------------------------------------------------------------------------------------------------------------------------------------------------------------------------------------------------------------------------------------------------------------------------------------------------------------------------------------------------------------------------|

|        |                                                                       |        |                                                                                     |                                                                                                 |                                                                                                   |                                                                                                                                                         |                                                                                                                                                                                                                                                                                                                                                                                                                                                                                               |                                                                                                                                                                                                                                                                                                                                                                        |
|--------|-----------------------------------------------------------------------|--------|-------------------------------------------------------------------------------------|-------------------------------------------------------------------------------------------------|---------------------------------------------------------------------------------------------------|---------------------------------------------------------------------------------------------------------------------------------------------------------|-----------------------------------------------------------------------------------------------------------------------------------------------------------------------------------------------------------------------------------------------------------------------------------------------------------------------------------------------------------------------------------------------------------------------------------------------------------------------------------------------|------------------------------------------------------------------------------------------------------------------------------------------------------------------------------------------------------------------------------------------------------------------------------------------------------------------------------------------------------------------------|
| 1<br>4 | Byström K.,<br>Grahn P. and<br>Hägerhäll C.<br>(2019)                 | Sweden | Interventional<br>study (field<br>experiment) –<br>using<br>qualitative<br>methods  | Children (with<br>disabilities, i.e.<br>autism)<br><br>(n=9; mental age<br>range: 4–6<br>years) | Both –<br>immersion in a<br>farm and<br>surrounding<br>nature (no<br>specifications)              | <b>KOMSI<br/>treatment</b> –<br>nature<br>therapy for<br>treating<br>children with<br>disabilities<br>(i.e.<br>horseback<br>riding, free<br>play, etc.) | <ul style="list-style-type: none"> <li>- The intervention led researchers to conclude on three key benefits of the intervention: 1) reduce stress and instill calm, 2) arouse curiosity and interest, and 3) attract attention spontaneously.</li> <li>- These three perceived benefits are related to <b>vitality forms</b>. It is argued that the <b>vitality forms</b> from nature and animals are favorable for effecting development-promoting interactions with a therapist.</li> </ul> | <ul style="list-style-type: none"> <li>- <b>Therapeutic environment (F/B)</b><br/>- if in nature it can trigger positive or negative responses for the child (i.e. not all autistic children would appreciate being out)</li> <li>- <b>Presence of animals (F)</b> - for this subgroup, animals and nature facilitated communication and alleviated stress.</li> </ul> |
| 1<br>5 | Ana BY, Wanga D., Liua XJ., Guanb HM., Wei HX. and Renb ZB.<br>(2019) | China  | Interventional<br>study (field<br>experiment) –<br>using<br>quantitative<br>methods | Adults<br>(undergraduates<br>in horticulture)                                                   | Green spaces<br>– across three<br>types of<br>forests: 1)<br>Maple,<br><br>2) Birch<br><br>3) Oak | Forest<br>Bathing in<br>three types of<br>forests                                                                                                       | <ul style="list-style-type: none"> <li>- This study looked at the relationship between environmental factors (temperature, RH, light intensity, and light spectrum)</li> </ul>                                                                                                                                                                                                                                                                                                                | <ul style="list-style-type: none"> <li>- <b>Tree species (F)</b> - maple&gt; oak&gt; birch for HR improvements. Yet, birch forests still had HR improvements, and was the only one to demonstrate that at</li> </ul>                                                                                                                                                   |

|        |                                                                                                               |     |                   |                                             |                                                     |                                                                                              |                                                                                                                                                                                                                                                                                                                                                                                                                                                                                |                                                                                                                                                                                                                                                                                                                                                                               |
|--------|---------------------------------------------------------------------------------------------------------------|-----|-------------------|---------------------------------------------|-----------------------------------------------------|----------------------------------------------------------------------------------------------|--------------------------------------------------------------------------------------------------------------------------------------------------------------------------------------------------------------------------------------------------------------------------------------------------------------------------------------------------------------------------------------------------------------------------------------------------------------------------------|-------------------------------------------------------------------------------------------------------------------------------------------------------------------------------------------------------------------------------------------------------------------------------------------------------------------------------------------------------------------------------|
|        |                                                                                                               |     |                   | (n=13; M=7 and F=6; mean age: 21 years old) |                                                     |                                                                                              | <ul style="list-style-type: none"> <li>and physiological changes (SP, DP, and HR).</li> <li>- Pre-forest-bathing <b>temperature</b> and <b>spectrum</b> can impact the response of blood pressure due to the "law of the initial value".</li> <li>- HR was influenced positively by visits to maple &gt;oak&gt;birch trees.</li> <li>- Authors recommend visitors to walk in <b>maple</b> forests to obtain cardiovascular and autonomic nervous system well-being.</li> </ul> | <p>lower levels of BP to begin with.</p> <ul style="list-style-type: none"> <li>- <b>Temperature</b> (B) - Pre-forest bathing temperature can negatively impact the response of BP if PPTs felt too cool and moist.</li> <li>- <b>Light spectrum</b> (B) - pre-forest bathing spectrum can negatively impact the response of BP if high G/B ratio are too extreme.</li> </ul> |
| 1<br>6 | Leavell M.A.,<br>Leiferman J. A.,<br>Gascon M.,<br>Braddick F.,<br>Gonzalez J. C.<br>and Litt J. S.<br>(2019) | USA | Literature review | Across age groups                           | Both – across several types of natural environments | Several types of NBIs being reviewed here - i.e. water rafting, horticulture, green exercise | <ul style="list-style-type: none"> <li>- Nature-based social prescription increases <b>social connectedness</b> and influences <b>physical health</b> and <b>mental well-being</b> by certain</li> </ul>                                                                                                                                                                                                                                                                       | <ul style="list-style-type: none"> <li>- <b>Intrapersonal processes</b> (F) - give way to social connections and longer-term health outcomes.</li> <li>- <b>Interpersonal processes</b> (F) - improves social connections and</li> </ul>                                                                                                                                      |

|        |                                                                                                                                                                     |                                   |                                                  |                          |            |                                                                            |                                                                                                                                                                                                                                                                                                           |                                                                                                                                                                                                                                                                                                                                                                                                                                                                                                                                                                                                                                                              |
|--------|---------------------------------------------------------------------------------------------------------------------------------------------------------------------|-----------------------------------|--------------------------------------------------|--------------------------|------------|----------------------------------------------------------------------------|-----------------------------------------------------------------------------------------------------------------------------------------------------------------------------------------------------------------------------------------------------------------------------------------------------------|--------------------------------------------------------------------------------------------------------------------------------------------------------------------------------------------------------------------------------------------------------------------------------------------------------------------------------------------------------------------------------------------------------------------------------------------------------------------------------------------------------------------------------------------------------------------------------------------------------------------------------------------------------------|
|        |                                                                                                                                                                     |                                   |                                                  |                          |            |                                                                            | <p>intrapersonal, interpersonal, and environmental pathways.</p> <ul style="list-style-type: none"> <li>- NBI practice represents a low cost, creative intervention to <b>strengthen social networks, reduce stress, and facilitate social connectedness</b> among participants and providers.</li> </ul> | <p>health outcomes by promoting social involvement, relatedness, and shared learning.</p> <ul style="list-style-type: none"> <li>- <b>Environmental processes</b> (B/F) – such as access to nature, perceived neighbourhood attachment, and perceived aesthetics.</li> </ul>                                                                                                                                                                                                                                                                                                                                                                                 |
| 1<br>7 | <p>Hunter R.F.,<br/>Cleland C.,<br/>Cleary A.,<br/>Droomers M.,<br/>Wheeler B.W.,<br/>Sinnette D.,<br/>Nieuwenhuijse<br/>n M.J. and<br/>Braubachi M.<br/>(2019)</p> | <p>USA,<br/>Australia,<br/>UK</p> | <p>Meta-narrative<br/>evidence<br/>synthesis</p> | <p>Across<br/>groups</p> | <p>age</p> | <p>Urban green spaces – i.e. urban parks, rooftops, parking lots, etc.</p> | <p>Any NBI intervention that has only physical changes to the UGS or with health promotion to tackle inequalities</p>                                                                                                                                                                                     | <ul style="list-style-type: none"> <li>- There was strong evidence for: 1) <b>park-based and greenway/ trail interventions</b> employing a <b>dual</b> approach (i.e. a physical change to the UGS and promotion/marketing programmes); 2) <b>Greening of vacant lots</b> which reduced stress and social benefits (e.g.</li> <li>- <b>Changes to the built environment in parks</b> (with dual-approach) (F) - provision of signage and community garden, improvements in existing playing fields, replacement of old playground equipment, installation of outdoor gyms, improved footpaths and clearing of rubbish and vandalism all increased</li> </ul> |

|    |                                                   |              |                                |                   |                                                                           |                                             |                                                                                                                                                                                                                                                                                                                                                  |                                                                                                                                                                                                                                                                                                                                                                                   |
|----|---------------------------------------------------|--------------|--------------------------------|-------------------|---------------------------------------------------------------------------|---------------------------------------------|--------------------------------------------------------------------------------------------------------------------------------------------------------------------------------------------------------------------------------------------------------------------------------------------------------------------------------------------------|-----------------------------------------------------------------------------------------------------------------------------------------------------------------------------------------------------------------------------------------------------------------------------------------------------------------------------------------------------------------------------------|
|    |                                                   |              |                                |                   |                                                                           |                                             | <p>reduction in crime, increased perceptions of safety); 3) <b>Greening of urban streets</b> and SuDS for managing storm water had environmental benefits as well.</p>                                                                                                                                                                           | <p>individual's park use, physical activity and the latter two improved QoL and perception of safety.</p> <ul style="list-style-type: none"> <li>- <b>Proximity</b> to newly developed walking/cycling routes (F) - increased use of these UGS.</li> <li>- <b>Greening of vacant lots</b> (F) – reduced perception of unsafe environment and bolster use of these UGS.</li> </ul> |
| 18 | <p><i>van den Bosch M. and Sang O. (2017)</i></p> | Not provided | Systematic review (of reviews) | Across age groups | Both - (i.e. green infrastructure, biodiversity, blue environments, etc.) | Interventions in urban natural environments | <ul style="list-style-type: none"> <li>- There is strong evidence on the effect of urban nature <b>on affect state</b>.</li> <li>- There is strong evidence on the effect of urban nature on <b>urban heat reduction</b>.</li> <li>- <b>Positive affect and heat reduction</b> can mediate urban nature's effect on <b>mortality</b>.</li> </ul> | <ul style="list-style-type: none"> <li>- <b>Micro-features</b> (F)</li> <li>- <b>Conditions of natural environments</b> (B/F)</li> <li>- <b>Perceived quality</b> (F)</li> <li>- <b>Accessibility</b> (B/F)</li> <li>- <b>Safety</b> (B)</li> </ul>                                                                                                                               |

|        |                                                                                                   |                                    |                      |                                             |                                                                                                      |                                                                                                                       |                                                                                                                                                                                                                                                                                                                                                                                                                                                                                                                                             |                                                                                                                                                                                                                                                                                                                                                                                                                                                                                                                                                                                               |
|--------|---------------------------------------------------------------------------------------------------|------------------------------------|----------------------|---------------------------------------------|------------------------------------------------------------------------------------------------------|-----------------------------------------------------------------------------------------------------------------------|---------------------------------------------------------------------------------------------------------------------------------------------------------------------------------------------------------------------------------------------------------------------------------------------------------------------------------------------------------------------------------------------------------------------------------------------------------------------------------------------------------------------------------------------|-----------------------------------------------------------------------------------------------------------------------------------------------------------------------------------------------------------------------------------------------------------------------------------------------------------------------------------------------------------------------------------------------------------------------------------------------------------------------------------------------------------------------------------------------------------------------------------------------|
| 1<br>9 | <p>Houlden V.,<br/>Weich S., de<br/>Albuquerque<br/>J.P., Jarvis S.<br/>and Rees K<br/>(2018)</p> | Europe USA<br>Canada,<br>Australia | Systematic<br>review | Adolescents,<br>adults, and older<br>adults | Green spaces<br>– mixed<br>definition that<br>encompasses<br>vegetated<br>areas and/or<br>wilderness | Not<br>interventions<br>per se, but<br>includes<br>studies with<br>walking in<br>GS as<br>measure for<br>visits to GS | <ul style="list-style-type: none"> <li>- There was <b>adequate evidence</b> for associations between the <b>amount of local-area greenspace and life satisfaction</b> (hedonic wellbeing), but <b>not personal flourishing</b> (eudaimonic wellbeing).</li> <li>- Evidence for associations between <b>mental wellbeing and visits to greenspace, accessibility, and types of greenspace</b> was limited.</li> <li>- There <b>was inadequate evidence</b> for associations with views of greenspace and connectedness to nature.</li> </ul> | <ul style="list-style-type: none"> <li>- <b>Views of greenspace</b> (B/F) - if looking at unpleasant urban/rural views it will have negative association with mental health.</li> <li>- <b>Connection with nature</b> (F) - the more connected one is with nature, the more health benefits (i.e. life satisfaction, happiness, affect, QoL) one will experience. This is modulated by <b>being actively engage</b> in nature, however.</li> <li>- <b>Visits to greenspaces</b> (F) - active immersion in wilderness was found to lead to greater happiness, affect and attention.</li> </ul> |
|--------|---------------------------------------------------------------------------------------------------|------------------------------------|----------------------|---------------------------------------------|------------------------------------------------------------------------------------------------------|-----------------------------------------------------------------------------------------------------------------------|---------------------------------------------------------------------------------------------------------------------------------------------------------------------------------------------------------------------------------------------------------------------------------------------------------------------------------------------------------------------------------------------------------------------------------------------------------------------------------------------------------------------------------------------|-----------------------------------------------------------------------------------------------------------------------------------------------------------------------------------------------------------------------------------------------------------------------------------------------------------------------------------------------------------------------------------------------------------------------------------------------------------------------------------------------------------------------------------------------------------------------------------------------|



|    |                                          |                                     |                   |                                                    |                                                                    |                                                                                                                 |                                                                                                                                                                                                                                                                                                                                                                                                     |                                                                                                                                                                                                                                                                                                                                                                                                        |
|----|------------------------------------------|-------------------------------------|-------------------|----------------------------------------------------|--------------------------------------------------------------------|-----------------------------------------------------------------------------------------------------------------|-----------------------------------------------------------------------------------------------------------------------------------------------------------------------------------------------------------------------------------------------------------------------------------------------------------------------------------------------------------------------------------------------------|--------------------------------------------------------------------------------------------------------------------------------------------------------------------------------------------------------------------------------------------------------------------------------------------------------------------------------------------------------------------------------------------------------|
| 20 | McCormick R. (2017)                      | USA, Spain and others not specified | Systematic review | Children (age range: 0-18)                         | Green spaces – wooded playgrounds, natural habitats, gardens, etc. | Not interventions per se but does include studies who used walking in NOE as measure for visits to green space. | <ul style="list-style-type: none"> <li>- <b>Access</b> to green space is important to the <b>mental well-being, overall health, and cognitive development</b> of children. It promotes <b>attention restoration</b>, moderates the impacts of <b>stress</b>, improves <b>behaviours</b> and <b>symptoms of ADHD</b> and was even associated with <b>higher standardized test scores</b>.</li> </ul> | <ul style="list-style-type: none"> <li>- <b>Proximity to GS</b> (F) - only passive exposure but the closer one lives to nature, the better health outcomes they have.</li> <li>- <b>Physical activity</b> in NOE (F) - <b>walking</b> in nature for children vs in urban environment led to improved attention and spatial working memory - which can help children with ADHD focus better.</li> </ul> |
| 21 | Barrett J., Evans S. and Mapes N. (2019) | UK                                  | Literature review | Older adults (residents of dementia care settings) | Green space – garden areas within dementia care settings           | Green dementia care - includes many type of NBIs (i.e. horticulture, walking, gardening, etc.)                  | <ul style="list-style-type: none"> <li>- Compelling evidence for <b>several health and wellbeing benefits</b> associated with green dementia care (i.e. improved wellbeing, social interactions, stress-reduction and restorative effects, self-</li> </ul>                                                                                                                                         | <ul style="list-style-type: none"> <li>- <b>Safety concerns</b> (i.e. fear of falling in garden) (B)</li> <li>- <b>Staff attitudes and lack of staff education</b> and awareness (B)</li> <li>- <b>Social prejudice and stigma</b> (B)</li> <li>- <b>Limited staff</b> to accompany residents and <b>limited resources</b> (B)</li> <li>- <b>Weather</b> (B)</li> </ul>                                |

|        |                                                                                                    |        |                                                              |                                                                              |                                                                                  |                                                                                                                                                                                                                                                                                                                                                                                                                                                                             |                                                                                                                                                                                                                                                                                                                       |
|--------|----------------------------------------------------------------------------------------------------|--------|--------------------------------------------------------------|------------------------------------------------------------------------------|----------------------------------------------------------------------------------|-----------------------------------------------------------------------------------------------------------------------------------------------------------------------------------------------------------------------------------------------------------------------------------------------------------------------------------------------------------------------------------------------------------------------------------------------------------------------------|-----------------------------------------------------------------------------------------------------------------------------------------------------------------------------------------------------------------------------------------------------------------------------------------------------------------------|
|        |                                                                                                    |        |                                                              |                                                                              |                                                                                  | <p>worth and confidence.)</p> <ul style="list-style-type: none"> <li>- Evidence base is stronger regarding the <b>barriers and facilitators</b> to accessing nature for this population - <b>staff education and care culture</b> is critical to the success and effective use of the garden for such residents.</li> <li>- <b>Design</b> of the outdoor space need to ensure that these spaces are <b>visually and physically accessible</b> for its residents.</li> </ul> | <ul style="list-style-type: none"> <li>- <b>Self-perception of being too old and lack of confidence</b> (B)</li> <li>- Poor physical and visual access</li> <li>- <b>Poor garden design</b> (B) (i.e. lack of resting places and weather protection)</li> <li>- <b>Care culture NOT person-centred</b> (B)</li> </ul> |
| 2<br>2 | <p>Otoni C.A.,<br/>Sims-Gould J.,<br/>Winters M.,<br/>Heijnen M. and<br/>McKay H.A.<br/>(2016)</p> | Canada | <p>Observational study (participant observation) – using</p> | <p>Older adults (60+) (n=28; F=17 and M=11, age range: 61-89, in 2012; n</p> | <p>Both areas – three areas in parks in Vancouver with features of GS and BS</p> | <p>Physical activity in nature - recorded as step counts/day (mean)</p> <ul style="list-style-type: none"> <li>- <b>Neighbourhood environments</b> influence health and well-being as people age.</li> <li>- There are strong interconnections between <b>built</b></li> </ul>                                                                                                                                                                                              | <ul style="list-style-type: none"> <li>- <b>Amenities</b> (F) – i.e. benches, seen as a necessity to promote social interactions and positive experiences.</li> <li>- <b>Ability to engage in other type of activities</b> (F) – i.e.</li> </ul>                                                                      |

|  |  |  |                            |                                      |  |  |                                                                                                                                                                                                                                                                                                                                                                            |                                                                                                                                                                                                                                                                                                                                                                                                                                                                                                                                                                                                                                                                                                                                                                 |
|--|--|--|----------------------------|--------------------------------------|--|--|----------------------------------------------------------------------------------------------------------------------------------------------------------------------------------------------------------------------------------------------------------------------------------------------------------------------------------------------------------------------------|-----------------------------------------------------------------------------------------------------------------------------------------------------------------------------------------------------------------------------------------------------------------------------------------------------------------------------------------------------------------------------------------------------------------------------------------------------------------------------------------------------------------------------------------------------------------------------------------------------------------------------------------------------------------------------------------------------------------------------------------------------------------|
|  |  |  | <p>qualitative methods</p> | <p>=22, F=12 and M= 10; in 2014)</p> |  |  | <p><b>and social environments.</b></p> <ul style="list-style-type: none"> <li>- <b>Microscale features</b> can enable older adults' to accommodate to their abilities.</li> <li>- <b>Benches</b> can promote mobility and social connectedness for older adults.</li> <li>- <b>Microscale features</b>, like benches, are a prudent investment for communities.</li> </ul> | <p>family or friends activities, going to the pub, going to the gym featured more prominently than benches in relation to their mobility.</p> <ul style="list-style-type: none"> <li>- <b>Injury (B)</b> - to use the outdoor environments.</li> <li>- <b>Wildlife (F)</b> - promoted feelings of enjoyment and calmness. Also helped in creating routines/familiarity with these spaces.</li> <li>- <b>Presence of other people (B/F)</b> - a negative experience for older adults if too many people use benches. But seeing people around them also provided positive feelings opportunities for social interactions.</li> <li>- <b>SES (B)</b> - <b>accessibility and availability</b> of GS and BS was more common for older adults with higher</li> </ul> |
|--|--|--|----------------------------|--------------------------------------|--|--|----------------------------------------------------------------------------------------------------------------------------------------------------------------------------------------------------------------------------------------------------------------------------------------------------------------------------------------------------------------------------|-----------------------------------------------------------------------------------------------------------------------------------------------------------------------------------------------------------------------------------------------------------------------------------------------------------------------------------------------------------------------------------------------------------------------------------------------------------------------------------------------------------------------------------------------------------------------------------------------------------------------------------------------------------------------------------------------------------------------------------------------------------------|

|        |                                                                        |    |                                                             |                                                                                                                     |                                                        |                          |                                                                                                                                                                                                                                                                                                                                                                                                                                                                            |                                                                                                                                                                                                                                                                                                                                                                                                                                                                                                                                                                                        |
|--------|------------------------------------------------------------------------|----|-------------------------------------------------------------|---------------------------------------------------------------------------------------------------------------------|--------------------------------------------------------|--------------------------|----------------------------------------------------------------------------------------------------------------------------------------------------------------------------------------------------------------------------------------------------------------------------------------------------------------------------------------------------------------------------------------------------------------------------------------------------------------------------|----------------------------------------------------------------------------------------------------------------------------------------------------------------------------------------------------------------------------------------------------------------------------------------------------------------------------------------------------------------------------------------------------------------------------------------------------------------------------------------------------------------------------------------------------------------------------------------|
|        |                                                                        |    |                                                             |                                                                                                                     |                                                        |                          |                                                                                                                                                                                                                                                                                                                                                                                                                                                                            | social and economic status.                                                                                                                                                                                                                                                                                                                                                                                                                                                                                                                                                            |
| 2<br>3 | Howarth M.,<br>Rogers M.,<br>Withnell N. and<br>McQuarrie C.<br>(2018) | UK | Observational study (cross-sectional) – using mixed-methods | Adults and older adults (suffering from mental disorders (n=47; age range: 35-68 years and average age: 53.2 years) | Green space – garden area created by social enterprise | Therapeutic horticulture | <ul style="list-style-type: none"> <li>- Quantitative findings showed that participants were working towards <b>self-reliance</b>. Qualitative data found similar results.</li> <li>- <b>Mental health recovery programme</b> enabled participant <b>integration</b> into the community through providing a space to <b>grow and build self-confidence</b> while reengaging with society.</li> <li>- The results suggest that using therapeutic horticulture as</li> </ul> | <ul style="list-style-type: none"> <li>- <b>Positive staff attitudes</b> (F) – welcoming and non-judgmental attitudes promoted wellbeing and social connection for this population. It also helped people feel safer.</li> <li>- <b>Activities as a new purpose</b> (F) – engaging in nature itself improved wellbeing and allowed people to feel a sense of purpose. By developing new skills people felt more confident in their own self and their employability.</li> <li>- <b>Presence of others</b> (F) – improved sense of purpose and recovery, as everybody shared</li> </ul> |

|        |                                                                      |                                                                                            |                   |                          |                                   |                                                                     |                                                                                                                                                                                                                                                                                                                                                                                                    |                                                                                                                                                                                                                                                                                                                                                                                                                                                                                                                                                                     |
|--------|----------------------------------------------------------------------|--------------------------------------------------------------------------------------------|-------------------|--------------------------|-----------------------------------|---------------------------------------------------------------------|----------------------------------------------------------------------------------------------------------------------------------------------------------------------------------------------------------------------------------------------------------------------------------------------------------------------------------------------------------------------------------------------------|---------------------------------------------------------------------------------------------------------------------------------------------------------------------------------------------------------------------------------------------------------------------------------------------------------------------------------------------------------------------------------------------------------------------------------------------------------------------------------------------------------------------------------------------------------------------|
|        |                                                                      |                                                                                            |                   |                          |                                   |                                                                     | an intervention within the mental health recovery programme can <b>support people with mental health problems</b> to re-engage socially.                                                                                                                                                                                                                                                           | same/similar experiences; this helped them move beyond their diagnosis. It also provided opportunities to re-engage with society.                                                                                                                                                                                                                                                                                                                                                                                                                                   |
| 2<br>4 | <i>Kabisch N., Matilda van den Bosch M. and Lafortezae R. (2017)</i> | U.S., Germany France Spain Denmark, Bulgaria, Austria, Sweden, UK, Japan, Canada and China | Systematic Review | Children and the elderly | Both – features of both GS and BS | Some studies included interventions / active engagement with nature | <ul style="list-style-type: none"> <li>- There is a tendency for a positive association between urban green and blue spaces and reduced risk factors related to urbanization for children and the elderly as well as the promotion of health-related behaviours and subsequent positive health outcomes.</li> <li>- But the evidence is weak and the results are somewhat inconsistent.</li> </ul> | <ul style="list-style-type: none"> <li>- <b>Socioeconomic factors</b> (B) (i.e. deprivation, income, educational level, unemployment) - the lower one's household, the worst their health outcomes, and the lower the relationship between health and nature.</li> <li>- <b>Air pollution</b> (B) - act as mediator of the relationship between nature and health - but not if elderly engage actively in NOE (i.e. gardening).</li> <li>- <b>Heat-related pollution</b> (B) - the higher the heat in parks, the less use and the worst health outcomes,</li> </ul> |

|        |                                                                              |                                                           |                   |                                                                  |                                                                                              |                                                                                    |                                                                                                                                                                                                                           |                                                                                                                                                                                                                                                                                                                                                                                    |
|--------|------------------------------------------------------------------------------|-----------------------------------------------------------|-------------------|------------------------------------------------------------------|----------------------------------------------------------------------------------------------|------------------------------------------------------------------------------------|---------------------------------------------------------------------------------------------------------------------------------------------------------------------------------------------------------------------------|------------------------------------------------------------------------------------------------------------------------------------------------------------------------------------------------------------------------------------------------------------------------------------------------------------------------------------------------------------------------------------|
|        |                                                                              |                                                           |                   |                                                                  |                                                                                              |                                                                                    |                                                                                                                                                                                                                           | specifically for the elderly.<br>- <b>Proximity/distance</b> (F/B) - proximity can modify effectiveness of NBIs.                                                                                                                                                                                                                                                                   |
| 2<br>5 | <i>Shin J.C., Parab K.V., An R. and Grigsby-Toussaint D.S. (2020)</i>        | USA, Australia, Canada, Spain, UK, Netherlands, Lithuania | Systematic review | Across age groups                                                | Green spaces – neighbourhood greenness, visits to GS, engagement in activities related to GS | Several interventions included: walking, gardening, work environment               | - <b>Green space exposure</b> (through active engagement) is associated with <b>better sleep quality and quantity.</b><br><br>- Authors suggest <b>green exercise and therapeutic gardening</b> for future interventions. | - <b>Time of day for activity</b> (F) – afternoon walking > morning walks.<br>- <b>Type of environment</b> (F) - outdoor > indoor interventions on sleep latency.<br>- <b>Behavioural preferences</b> (F) - people had better sleep on weekdays with lower exposure to green spaces. Also preferred vaster expenses of greenspace on weekends and for longer than during weekdays. |
| 2<br>6 | <i>Lakhani A., Norwood M., Watling D.P., Zeeman H. and Kendall E. (2019)</i> | USA, Norway, Netherlands, Australia, Korea, Japan         | Systematic review | Adults and older adults (suffering from neurological disability: | Both – includes studies with features from both green and blue environments                  | Several interventions included: gardening, green care farming, wilderness therapy, | - Given the limited research to date, and the diversity of nature specific activities, it is <b>not possible to establish</b>                                                                                             | - <b>Environment type</b> (F) - for care farming, evidence is mixed on social health.<br>- <b>Garden design</b> (F) - gardens often well arranged, walled                                                                                                                                                                                                                          |

|  |  |  |  |                                     |  |                |                                                                                                                                                                                                                                                                                                                                                                                                                            |                                                                                                                                                                                                                                                                                                                                                                                                                                                                                                                                                                                                                                                                                                                        |
|--|--|--|--|-------------------------------------|--|----------------|----------------------------------------------------------------------------------------------------------------------------------------------------------------------------------------------------------------------------------------------------------------------------------------------------------------------------------------------------------------------------------------------------------------------------|------------------------------------------------------------------------------------------------------------------------------------------------------------------------------------------------------------------------------------------------------------------------------------------------------------------------------------------------------------------------------------------------------------------------------------------------------------------------------------------------------------------------------------------------------------------------------------------------------------------------------------------------------------------------------------------------------------------------|
|  |  |  |  | dementia, stroke, and brain injury) |  | forest therapy | <p><b>definitive conclusions</b> around the efficacy of engaging with nature specific activities on the <b>psychosocial health</b> of people with neurological disability.</p> <ul style="list-style-type: none"> <li>- At best, findings clarify that <b>engaging</b> with natural environments contribute to favourable <b>emotional health outcomes and social health outcomes</b> for people with dementia.</li> </ul> | <p>and preferably in connection with a shielded dementia care unit, may also improve agitation among people with dementia.</p> <ul style="list-style-type: none"> <li>- <b>Mobility (B)</b> - impact of wander gardens on agitation reduction was lower if PPT had ambulatory issues.</li> <li>- <b>Presence of caregiver (F)</b> - brought positive emotional health outcomes in patients with dementia, when entering garden.</li> <li>- <b>Short-term plants (F)</b> –associated with improved social health vs long-term plants. Possibly due to faster harvesting capacity.</li> <li>- <b>Active engagement (F)</b> - psychological health has been favourably impacted only when activities in nature</li> </ul> |
|--|--|--|--|-------------------------------------|--|----------------|----------------------------------------------------------------------------------------------------------------------------------------------------------------------------------------------------------------------------------------------------------------------------------------------------------------------------------------------------------------------------------------------------------------------------|------------------------------------------------------------------------------------------------------------------------------------------------------------------------------------------------------------------------------------------------------------------------------------------------------------------------------------------------------------------------------------------------------------------------------------------------------------------------------------------------------------------------------------------------------------------------------------------------------------------------------------------------------------------------------------------------------------------------|

|        |                                                                                                 |                                                                                                                                 |                              |                          |            |                                                   |                                                                                                                                 |                                                                                                                                                                                                                                                                                                                                                                                                                                                                                                                                            |                                                                                                                                                                                                                                                                                                                                                                                                                                                                                                                                                                                            |
|--------|-------------------------------------------------------------------------------------------------|---------------------------------------------------------------------------------------------------------------------------------|------------------------------|--------------------------|------------|---------------------------------------------------|---------------------------------------------------------------------------------------------------------------------------------|--------------------------------------------------------------------------------------------------------------------------------------------------------------------------------------------------------------------------------------------------------------------------------------------------------------------------------------------------------------------------------------------------------------------------------------------------------------------------------------------------------------------------------------------|--------------------------------------------------------------------------------------------------------------------------------------------------------------------------------------------------------------------------------------------------------------------------------------------------------------------------------------------------------------------------------------------------------------------------------------------------------------------------------------------------------------------------------------------------------------------------------------------|
|        |                                                                                                 |                                                                                                                                 |                              |                          |            |                                                   |                                                                                                                                 | involve active engagement.                                                                                                                                                                                                                                                                                                                                                                                                                                                                                                                 |                                                                                                                                                                                                                                                                                                                                                                                                                                                                                                                                                                                            |
| 2<br>7 | <p>Kondo M.C.,<br/>Fluehr J.M.,<br/>McKeon T. and<br/>Charles C.<br/>Branas C.C.<br/>(2018)</p> | <p>USA, UK,<br/>Netherlands<br/>, Canada,<br/>Lithuania,<br/>Denmark,<br/>Germany,<br/>Finland,<br/>Japan, Italy,<br/>Spain</p> | <p>Systematic<br/>review</p> | <p>Across<br/>groups</p> | <p>age</p> | <p>Green spaces<br/>– natural<br/>environment</p> | <p>Several<br/>types of<br/>interventions<br/>including:<br/>viewing<br/>nature,<br/>walking,<br/>exercising,<br/>gardening</p> | <ul style="list-style-type: none"> <li>- This review of experimental, quasi-experimental, and longitudinal studies found <b>evidence of a positive association</b> between urban green space and <b>attention, mood, and physical activity, and negative association with mortality, short-term cardiovascular markers (heart rate), and violence.</b></li> <li>- In most cases, it is not possible to observe patterns of findings of association between urban green space exposure and health outcomes (i.e. birth outcomes,</li> </ul> | <ul style="list-style-type: none"> <li>- <b>Environment type</b> (F) - natural environment &gt; urban built environment for attention, general health, cardiovascular outcomes (i.e. HR, HRV), mood and emotions (i.e. specifically urban woodlands for restoration).</li> <li>- Biodiversity (F) - found to improve <b>mood and emotions</b> but is mediated by length of park visit and perceived restoration.</li> <li>- Physical activity (F) - engagement in PA in nature was positively associated with health outcomes in experimental studies VS observational studies.</li> </ul> |



|    |                                                                                                         |                                                                            |                       |                          |                                                            |                                                                                             |                                                                                                                                                                                                                                                     |                                                                                                                                                                                                                                                                                                                                                             |
|----|---------------------------------------------------------------------------------------------------------|----------------------------------------------------------------------------|-----------------------|--------------------------|------------------------------------------------------------|---------------------------------------------------------------------------------------------|-----------------------------------------------------------------------------------------------------------------------------------------------------------------------------------------------------------------------------------------------------|-------------------------------------------------------------------------------------------------------------------------------------------------------------------------------------------------------------------------------------------------------------------------------------------------------------------------------------------------------------|
|    |                                                                                                         |                                                                            |                       |                          |                                                            |                                                                                             | stress, BP, cancer, diabetes, etc.).                                                                                                                                                                                                                |                                                                                                                                                                                                                                                                                                                                                             |
| 28 | <p>Callaghan A., McCombe G., Harrold A., McMeel C., Mills G., Moore-Cherryb N. and Cullen W. (2020)</p> | <p>Australia, USA, UK, Bulgaria, Belgium, Denmark, Netherlands, Serbia</p> | <p>Scoping review</p> | <p>Across age groups</p> | <p>Green spaces – urban parks, neighbourhood greenness</p> | <p>Several interventions included: horticultural therapy, walking, viewing from indoors</p> | <ul style="list-style-type: none"> <li>- The majority of studies found a <b>positive association</b> between GS and mental health.</li> <li>- Policies to increase urban green space may have <b>sustainable public health benefits</b>.</li> </ul> | <ul style="list-style-type: none"> <li>- <b>Ethnicity (B)</b> - South Asian children living in more deprived areas and with lower access and quality of GS had more behavioural difficulties VS white British children.</li> <li>- <b>Deprivation (B)</b> - quality and access to greenspaces is lower in deprived and lower-income communities,</li> </ul> |

|    |                                                                                                                                                                                                 |                                   |                                                                 |                                                                                                |                                          |                                                                                         |                                                                                                                                                                                                                                                                                                                                                                                                                                                                          |                                                                                                                                                                                                                                                                                                                                     |
|----|-------------------------------------------------------------------------------------------------------------------------------------------------------------------------------------------------|-----------------------------------|-----------------------------------------------------------------|------------------------------------------------------------------------------------------------|------------------------------------------|-----------------------------------------------------------------------------------------|--------------------------------------------------------------------------------------------------------------------------------------------------------------------------------------------------------------------------------------------------------------------------------------------------------------------------------------------------------------------------------------------------------------------------------------------------------------------------|-------------------------------------------------------------------------------------------------------------------------------------------------------------------------------------------------------------------------------------------------------------------------------------------------------------------------------------|
|    |                                                                                                                                                                                                 |                                   |                                                                 |                                                                                                |                                          |                                                                                         |                                                                                                                                                                                                                                                                                                                                                                                                                                                                          | leading to worse health outcomes.                                                                                                                                                                                                                                                                                                   |
| 29 | <p>Koselka E.P.D.,<br/>Weidner L.C.,<br/>Minasov A.,<br/>Berman M.G.,<br/>Leonard W.R.,<br/>Santoso M.V.,<br/>de Brito J.N.,<br/>Pope Z.C.,<br/>Pereira M.A.<br/>and Horton T.H.<br/>(2019)</p> | USA                               | Interventional study (pilot study) – using quantitative methods | Adults (undergraduates, graduates and employees) (n=37; 18–35 years; age mean=22.9 and SD=4.6) | Green                                    | Walking in nature across 3 settings: forest; along roadside, activities of daily living | <ul style="list-style-type: none"> <li>- This study has found that <b>moderate-intensity walking</b> in a forested environment had a <b>positive impact on psychological health</b>.</li> <li>- This suggests that completing <b>physical activity</b> in greenspaces <b>amplifies beneficial acute psychological responses</b> and yields greater improvements in <b>mental health</b> than does activity completed indoors or in a built urban environment.</li> </ul> | <ul style="list-style-type: none"> <li>- <b>Type of environment (F)</b> - forest walking &gt;roadside&gt; daily activities for positive/negative affect, perceived stress, and anxiety.</li> <li>- <b>Physical activity (F)</b> - walking in general brought improved mental health but amplified in forest environment.</li> </ul> |
| 30 | Zufferey J. (2016)                                                                                                                                                                              | Japan, Australia, China, USA, New |                                                                 |                                                                                                | Both – GS and BS elements (not specific) | Not specified per se, but includes studies with walking/                                | <ul style="list-style-type: none"> <li>- This literature review shows moderate to strong empirical evidence for the</li> </ul>                                                                                                                                                                                                                                                                                                                                           | <ul style="list-style-type: none"> <li>- <b>Age (F)</b> - children and young adults seemed to benefit more from exposure to GS and</li> </ul>                                                                                                                                                                                       |

|        |                                                                        |                 |                   |               |                                          |                       |                                                                                                                                                                                                                                                                                                                                                                                                                                                |                                                                                                                                                                                                                                                                                                                                                                                                     |
|--------|------------------------------------------------------------------------|-----------------|-------------------|---------------|------------------------------------------|-----------------------|------------------------------------------------------------------------------------------------------------------------------------------------------------------------------------------------------------------------------------------------------------------------------------------------------------------------------------------------------------------------------------------------------------------------------------------------|-----------------------------------------------------------------------------------------------------------------------------------------------------------------------------------------------------------------------------------------------------------------------------------------------------------------------------------------------------------------------------------------------------|
|        |                                                                        | Zealand, Canada | Systematic review | Across groups | age                                      | exercise in GS and BS | <p>positive influence of <b>contact</b> with green and blue spaces and <b>mental and physical health</b> and <b>low evidence</b> for influences on <b>social cohesion</b>.</p> <ul style="list-style-type: none"> <li>- It also shows that health impacts may vary according to the <b>population group</b> considered (e.g. children, people with low socio-economic status who benefit more from exposure to these environments).</li> </ul> | <p>BS, especially via physical activity; which had combined effects on physical and mental health.</p> <ul style="list-style-type: none"> <li>- <b>SES</b> (B/F) - lower SES households tended to have more health benefits associated with exposure to green and blue spaces.</li> <li>- <b>Type of environment</b> (F) - natural environments &gt; urban built on emotional wellbeing.</li> </ul> |
| 3<br>1 | Costello L.,<br>McDermott M-<br>L., Patela P.<br>and Dare J.<br>(2019) | Australia       |                   |               | Blue – the ocean and surrounding beaches | Ocean swimming        | <ul style="list-style-type: none"> <li>- All the ocean swimming groups studied were united by their <b>routine</b> of beach swimming, by their <b>love of the ocean</b>, and their conviction that</li> </ul>                                                                                                                                                                                                                                  | <ul style="list-style-type: none"> <li>- <b>Type of environment</b> (F) - swimming in the ocean VS public/private pool.</li> <li>- <b>Biodiversity</b> (B/F) - when seeing fishes, dolphins, whales, etc. people experienced</li> </ul>                                                                                                                                                             |

|        |                                                    |    |                                                               |                                                                                            |                                      |                                        |                                                                                                                                                  |                                                                                                                                                                                                                                                                                                                                                                                                                                                                                                                                                                               |
|--------|----------------------------------------------------|----|---------------------------------------------------------------|--------------------------------------------------------------------------------------------|--------------------------------------|----------------------------------------|--------------------------------------------------------------------------------------------------------------------------------------------------|-------------------------------------------------------------------------------------------------------------------------------------------------------------------------------------------------------------------------------------------------------------------------------------------------------------------------------------------------------------------------------------------------------------------------------------------------------------------------------------------------------------------------------------------------------------------------------|
|        |                                                    |    | Observational study (ethnography) – using qualitative methods | Older adults (self-organised ocean swimmers) (n=10; F=7 and M=10; age range: 55-80+ years) |                                      |                                        | their ocean swimming practice <b>as part of a group</b> was beneficial for their social connectedness, wellbeing and physical and mental health. | positive emotions and pleasurable experiences. However fear of sharks led to negative emotions, despite increasing social cohesion.<br>- <b>Type of activity</b> (F) - swimming > other type of outdoor exercise, as it was low-impact. It would also help in alleviating stress.<br>- <b>Weather</b> (F) - despite cold and rainy weather, PPTs would still engage in swimming, as their commitment to the group was the priority.<br>- <b>Group membership</b> (F) - PPTs recognised that they would not derive the same enjoyment, pleasure and health benefits w/o group. |
| 3<br>2 | <i>Birch J., Rishbeth C. and Payne S.R. (2020)</i> | UK |                                                               | Adolescents and adults (n=24;                                                              | Both – urban parks in Sheffield (UK) | Arts workshop and interviews in nature | - Deteriorating landscapes, young people's shifting identities and perceived time pressures                                                      | - <b>Poor quality of urban environment</b> (B) – or urban deprivation, was more important than                                                                                                                                                                                                                                                                                                                                                                                                                                                                                |

|        |                                                                                                                              |    |                                                                    |                                                                                                                                    |       |                                                                                                                        |                                                                                                                                                                                                                                                                                                                    |                                                                                                                                                                                                                                                                                                                                                                                                                                                                  |
|--------|------------------------------------------------------------------------------------------------------------------------------|----|--------------------------------------------------------------------|------------------------------------------------------------------------------------------------------------------------------------|-------|------------------------------------------------------------------------------------------------------------------------|--------------------------------------------------------------------------------------------------------------------------------------------------------------------------------------------------------------------------------------------------------------------------------------------------------------------|------------------------------------------------------------------------------------------------------------------------------------------------------------------------------------------------------------------------------------------------------------------------------------------------------------------------------------------------------------------------------------------------------------------------------------------------------------------|
|        |                                                                                                                              |    | Observational study (case study) – using qualitative methods       | F=14 and M=10; age range: 17-27 years, with n=9 experiencing mental difficulties and n=15 living in an area of urban deprivation). |       |                                                                                                                        | <p>disrupted support.</p> <ul style="list-style-type: none"> <li>- Overall young people expressed how urban nature encounters were experienced <b>as accepting and relational</b>, offering a <b>stronger sense of self</b>; feelings of escape connection and care with the human and non-human world.</li> </ul> | <p>ethnicity and SES across PPTs.</p> <ul style="list-style-type: none"> <li>- <b>Presence of others</b> (F/B) - having someone with you during a visit to an urban environment was positively experienced (i.e. wanting someone to share experience with), or negatively experienced (i.e. wanting to be alone).</li> <li>- <b>Individual factors</b> (B/F) - pressures, changing priorities and changing friendships all have their mediating role.</li> </ul> |
| 3<br>3 | Wood E.,<br>Harsant A.,<br>Dallimer M.,<br>ronin de<br>Chavez A.,<br>McEachan<br>R.R.C. and<br>Christopher<br>Hassall (2018) | UK | Observational study (cross-sectional) – using quantitative methods | Adults and older adults (users of local parks in deprived areas) (n=128; F=59 and M=69; age range: 18-76+ years)                   | Green | <p>Visits to greenspaces</p> <ul style="list-style-type: none"> <li>- survey conducted at the park entrance</li> </ul> | <ul style="list-style-type: none"> <li>- Authors found that <b>biodiversity</b> and site facilities were positively correlated within urban parks. However, we found that only <b>biodiversity was related to perceptions of psychological restoration</b> amongst a multi-</li> </ul>                             | <ul style="list-style-type: none"> <li>- <b>Biodiversity</b> (F) - the more biodiversity a park had; the more people would benefit from psychological restoration.</li> <li>- <b>Amenities</b> - positively correlated with urban parks, but no effects on psychological restoration.</li> </ul>                                                                                                                                                                 |

|        |                                                                                                           |                                        |                                                      |                                |                                                                |                                                                                              |                                                                                                                                                                                                                                                                                                                                                                                                    |                                                                                                                                                                                                                                                                                                                                                             |
|--------|-----------------------------------------------------------------------------------------------------------|----------------------------------------|------------------------------------------------------|--------------------------------|----------------------------------------------------------------|----------------------------------------------------------------------------------------------|----------------------------------------------------------------------------------------------------------------------------------------------------------------------------------------------------------------------------------------------------------------------------------------------------------------------------------------------------------------------------------------------------|-------------------------------------------------------------------------------------------------------------------------------------------------------------------------------------------------------------------------------------------------------------------------------------------------------------------------------------------------------------|
|        |                                                                                                           |                                        |                                                      |                                |                                                                |                                                                                              | <p>ethnic group of PPTs.</p> <ul style="list-style-type: none"> <li>- These findings suggest that urban planners should aim to enhance <b>ecological diversity</b> in urban green spaces.</li> </ul>                                                                                                                                                                                               | <ul style="list-style-type: none"> <li>- <b>Ethnicity</b> - no effects found.</li> </ul>                                                                                                                                                                                                                                                                    |
| 3<br>4 | <p>Corazon S.S.,<br/>Sidenius U.,<br/>Poulsen D.V. ,<br/>Gramkow M.C.<br/>and Stigsdotter U.K. (2019)</p> | <p>Europe,<br/>Asia,<br/>Australia</p> | <p>Systematic Review<br/>(without meta-analysis)</p> | <p>Adults and older adults</p> | <p>Both – all types of outdoors natural green environments</p> | <p>All types of sedentary and light exercise activities, in all time durations in nature</p> | <ul style="list-style-type: none"> <li>- The synthesis of the results points towards outdoor, nature-based exposure having a positive effect on different <b>emotional parameters</b>, related to stress relief. The studies into physiological measures showed more equivocal results.</li> <li>- The general use of <b>self-referred individuals</b> imposes a potential strong bias.</li> </ul> | <ul style="list-style-type: none"> <li>- <b>Type of environments</b> (F) – natural environments vs control had positive association with emotional outcomes (i.e. positive affect, perceived stress and wellbeing/QoL), and negative association with negative affect. This could not be found for physiological measures – (too heterogeneous).</li> </ul> |

|        |                                                                                                                 |    |                                                          |                                                                                                                                                                  |               |                                                                                                                                        |                                                                                                                                                                                                                                                                                                                                                                                                                                                                                                                                                                                                        |                                                                                                                                                                                                                                                                                                                                                                                                                                                                                                     |
|--------|-----------------------------------------------------------------------------------------------------------------|----|----------------------------------------------------------|------------------------------------------------------------------------------------------------------------------------------------------------------------------|---------------|----------------------------------------------------------------------------------------------------------------------------------------|--------------------------------------------------------------------------------------------------------------------------------------------------------------------------------------------------------------------------------------------------------------------------------------------------------------------------------------------------------------------------------------------------------------------------------------------------------------------------------------------------------------------------------------------------------------------------------------------------------|-----------------------------------------------------------------------------------------------------------------------------------------------------------------------------------------------------------------------------------------------------------------------------------------------------------------------------------------------------------------------------------------------------------------------------------------------------------------------------------------------------|
| 3<br>5 | <p><i>Maund Pgreen.R., Irvine K.N., Reeves J., Strong E., Cromie R., Dallimer M. and Davies Z.G. (2019)</i></p> | UK | Interventional study (pilot study) – using mixed-methods | <p>Adults and older adults (already registered with the community mental wellbeing service and diagnosed with depression and/or anxiety) (n=16; F=8 and M=8)</p> | Blue wetlands | <p>– <b>Wetland NBI</b> – guided walking, bird watching or other activities (i.e. canoeing) done in nature over a six-week period.</p> | <ul style="list-style-type: none"> <li>- There were significant improvements in <b>mental health</b> across a range of indicators, including <b>mental wellbeing, anxiety, stress and emotional wellbeing.</b> Participants and healthcare professionals cited additional outcomes including <b>improved physical health and reduced social isolation.</b></li> <li>- The wetland site provided a <b>sense of escape</b> from participants' everyday environments, facilitating relaxation and <b>reductions in stress.</b></li> <li>- Wetland <b>staff knowledge</b> of the natural world,</li> </ul> | <ul style="list-style-type: none"> <li>- <b>NBI design (F)</b> - to be successful, NBIs need to take into account transportation, staff knowledge and group dynamics.</li> <li>- <b>Biodiversity (F)</b> - the presence of water, diverse wildlife and the inherent peacefulness of wetlands were positively experienced with the intervention.</li> <li>- <b>Session content (B/F)</b> - most PPTs preferred if there was only ONE activity vs many → less stress and anxiety that way.</li> </ul> |
|--------|-----------------------------------------------------------------------------------------------------------------|----|----------------------------------------------------------|------------------------------------------------------------------------------------------------------------------------------------------------------------------|---------------|----------------------------------------------------------------------------------------------------------------------------------------|--------------------------------------------------------------------------------------------------------------------------------------------------------------------------------------------------------------------------------------------------------------------------------------------------------------------------------------------------------------------------------------------------------------------------------------------------------------------------------------------------------------------------------------------------------------------------------------------------------|-----------------------------------------------------------------------------------------------------------------------------------------------------------------------------------------------------------------------------------------------------------------------------------------------------------------------------------------------------------------------------------------------------------------------------------------------------------------------------------------------------|

|    |                                                                                                    |        |                                                                    |                                                                                                   |                                                                                                     |                                                   |                                                                                                                                                                                                                                                                                                                                                                                                                                                                |                                                                                                                                                                                                                                          |
|----|----------------------------------------------------------------------------------------------------|--------|--------------------------------------------------------------------|---------------------------------------------------------------------------------------------------|-----------------------------------------------------------------------------------------------------|---------------------------------------------------|----------------------------------------------------------------------------------------------------------------------------------------------------------------------------------------------------------------------------------------------------------------------------------------------------------------------------------------------------------------------------------------------------------------------------------------------------------------|------------------------------------------------------------------------------------------------------------------------------------------------------------------------------------------------------------------------------------------|
|    |                                                                                                    |        |                                                                    |                                                                                                   |                                                                                                     |                                                   | transportation and group organisation also played a role in the intervention's success.                                                                                                                                                                                                                                                                                                                                                                        |                                                                                                                                                                                                                                          |
| 36 | Benjamin-Neelon S.E., Platt A., Bacardi-Gascon M., Armstrong S., Neelon B., Jimenez-Cruz A. (2019) | Mexico | Observational study (cross-sectional) – using quantitative methods | Children (n=102, age range: 3-5 years; in Ensenada (M=29 and F=21) and in Tijuana (F=27 and M=25) | Green spaces – urban parks in two cities (Tijuana and Ensenada)                                     | Time spent in GS (measured with GPS)              | <ul style="list-style-type: none"> <li>- <b>Greater time</b> in greenspace was associated with <b>decreased sedentary time</b>.</li> <li>- <b>Greater time</b> in greenspace was associated with <b>increased physical activity</b>.</li> <li>- Associations were mainly driven by children in <b>Tijuana</b> compared to Ensenada.</li> <li>- Time spent in greenspace was <b>not associated</b> with body mass index (<b>BMI</b>) <b>z-score</b>.</li> </ul> | <ul style="list-style-type: none"> <li>- <b>Duration</b> (F) - the greater the time spent in greenspace, the less sedentary time these children will experience, but also the greater their MVPA will be (physical activity).</li> </ul> |
| 37 | Coventry P.A., Neale C. Dyke A., Pateman R.                                                        | UK     |                                                                    | Adults and older adults (conservation volunteers) (n=45; F=20)                                    | Green spaces – across three sites: Askam Bog, St Nicks natural reserve and a large green field with | Three interventions : group walking, conservation | <ul style="list-style-type: none"> <li>- Undertaking <b>purposeful activity</b> in public green space has the potential to <b>promote health</b> and prevent</li> </ul>                                                                                                                                                                                                                                                                                        | <ul style="list-style-type: none"> <li>- <b>Location</b> (F)- effects differed for <b>stress</b> across locations, meaning that the location of the GS, over the type of activity, was</li> </ul>                                        |



|        |                                                            |                                          |                                                               |                                                         |                                                                                     |                                                                                                                                          |                                                                                                                                                                                                                                                                                                                                                                                                        |                                                                                                                                                                                                                                                                                                                                                                                                                                                                                                                 |
|--------|------------------------------------------------------------|------------------------------------------|---------------------------------------------------------------|---------------------------------------------------------|-------------------------------------------------------------------------------------|------------------------------------------------------------------------------------------------------------------------------------------|--------------------------------------------------------------------------------------------------------------------------------------------------------------------------------------------------------------------------------------------------------------------------------------------------------------------------------------------------------------------------------------------------------|-----------------------------------------------------------------------------------------------------------------------------------------------------------------------------------------------------------------------------------------------------------------------------------------------------------------------------------------------------------------------------------------------------------------------------------------------------------------------------------------------------------------|
|        | and Cinderby S. (2019)                                     |                                          | Interventional study (field experiment) – using mixed-methods | and M=25; age mean: 43.8)                               | surrounding woodland, adjacent to a semi-urban housing development                  | , citizen science                                                                                                                        | <p><b>mental ill health.</b> Undertaking such activities in locations where people have the <b>most connection</b> might confer additional benefits.</p> <ul style="list-style-type: none"> <li>- <b>Social interaction, physical activity and restoration</b> were all implicated as potential mechanisms by which activities in public green spaces might lead to improved mental health.</li> </ul> | <p>an important factor in reducing stress - which was explained by an enhanced <b>place attachment</b> and <b>place identity</b> at this location.</p> <ul style="list-style-type: none"> <li>- <b>Type of activity (F)</b> - although not shown quantitatively, <b>conservation and citizen science</b> were both associated with deeper <b>sense of purpose</b> by providing <b>learning opportunities</b>, and because it conferred <b>co-benefits</b> to health, wellbeing and to nature itself.</li> </ul> |
| 3<br>8 | Britton E., Kindermann G., Domegan C. and Carlin C. (2018) | Europe, USA, Canada, New Zealand, Israel | Systematic review                                             | Across all age groups – but with pre-existing condition | Blue space – wilderness, sea, urban/semi-urban areas (beach, city), or mix of these | Several interventions included in BS: surfing, Dragon Boat Racing (DBR), sailing fly fishing kayaking, canoeing, at the beach, swimming, | <ul style="list-style-type: none"> <li>- Blue care have <b>direct benefit</b> mental health and psycho-social wellbeing.</li> <li>- There was also evidence for <b>greater social connectedness</b> during and after interventions, but results were <b>inconsistent</b></li> </ul>                                                                                                                    | <ul style="list-style-type: none"> <li>- <b>Access (F/B)</b></li> <li>- <b>Lack of resources/equipment (B)</b></li> <li>- <b>Fears/stigma (B)</b> - associated with personal abilities, level of fitness, environment, social and cultural norms, diagnosis of illnesses and level of appropriate training for those</li> </ul>                                                                                                                                                                                 |

|        |                                                                             |        |                                                                      |                                                                                                                                                                      |                                                                                                                                                                                     |                                                                                       |                                                                                                                                                                                                                                                                                                                                                                                                                                           |                                                                                                                                                                                                                                                                                                                                                                                                                                                                                   |
|--------|-----------------------------------------------------------------------------|--------|----------------------------------------------------------------------|----------------------------------------------------------------------------------------------------------------------------------------------------------------------|-------------------------------------------------------------------------------------------------------------------------------------------------------------------------------------|---------------------------------------------------------------------------------------|-------------------------------------------------------------------------------------------------------------------------------------------------------------------------------------------------------------------------------------------------------------------------------------------------------------------------------------------------------------------------------------------------------------------------------------------|-----------------------------------------------------------------------------------------------------------------------------------------------------------------------------------------------------------------------------------------------------------------------------------------------------------------------------------------------------------------------------------------------------------------------------------------------------------------------------------|
|        |                                                                             |        |                                                                      |                                                                                                                                                                      |                                                                                                                                                                                     | (as part of a kayaking intervention), and scuba diving                                | <ul style="list-style-type: none"> <li>- and mixed; with very few findings for physical health.</li> <li>- Findings suggest how <b>activities</b> in BS, rather than particular <b>qualities</b> of BS, might contribute to rehabilitation and health promotion.</li> </ul>                                                                                                                                                               | <ul style="list-style-type: none"> <li>- delivering intervention.</li> <li>- Gender</li> <li>- <b>Seasickness</b> - due to poor weather (B)</li> <li>- <b>Fatigue/tiredness</b> - post-intervention (B)</li> </ul>                                                                                                                                                                                                                                                                |
| 3<br>9 | <p>Saadi D., Schnell I., Tirosh E., Basagaña X. and Agay-Shay K. (2020)</p> | Israel | Interventional study (field experiment) – using quantitative methods | <p>Adults (women specifically) (n=120; age range: 20-35, from two small cities in the north of Israel, of whom n=48 were Arab and n=24 were Jewish women (n= 72)</p> | <p>Green spaces – across Afula-urban park, Afula-city center, Afula-residential area, Nazareth urban park, Nazareth-city center and Nazareth-residential area VS home (control)</p> | <p>Viewing and waling in nature while sitting on benches across 6 different sites</p> | <ul style="list-style-type: none"> <li>- <b>Visits to urban parks</b> compared to staying in the home environment had beneficial short-term changes in <b>psychological, physiological, and cognitive</b> responses, regardless of ethnicity.</li> <li>- The changes could <b>not be attributed</b> to the investigated <b>mediators</b>.</li> <li>- Women should be encouraged to go outdoors and specifically visit parks to</li> </ul> | <ul style="list-style-type: none"> <li>- <b>Environment type</b> (F/B) - Arab woman demonstrated improvement in most outdoor environments, while for the Jewish woman, improvement was reported mainly in parks, but not in any other urban environment.</li> <li>- <b>Socio-demographic</b> (ethnic preferences) (F) - whereby benefits were stronger in intra-ethnic parks.</li> <li>- <b>Comfort level at home</b> (F/B) - more comfort at home for Jewish women vs</li> </ul> |

|  |  |  |  |  |  |  |  |                                                      |                                                                                                                              |
|--|--|--|--|--|--|--|--|------------------------------------------------------|------------------------------------------------------------------------------------------------------------------------------|
|  |  |  |  |  |  |  |  | improve their psychological and physiological health | Arab women, which could have reduced positive effects of outdoor environments considered less comfortable for this subgroup. |
|--|--|--|--|--|--|--|--|------------------------------------------------------|------------------------------------------------------------------------------------------------------------------------------|
